# Supplementary material for: Interface engineering of porous Co(OH)2/La(OH)3@Cu nanowire heterostructures for high efficiency hydrogen evolution and overall water splitting
Source: Royal Society of Chemistry journal article supplement (doi:10.1039/d2ta08571b), 2023-01-01
Supplement: d2ta08571b1.pdf [file d2ta08571b1.pdf]

1 Supplementary Information

2 **Interface engineering of porous  $\text{Co}(\text{OH})_2/\text{La}(\text{OH})_3/\text{Cu}$  nanowires**  
3 **heterostructure for high efficiency hydrogen evolution and overall water splitting**

4

5 *Zhen Zhang<sup>1</sup>, Zhiqiang Wang<sup>2</sup>, Hang Zhang<sup>1</sup>, Zikuan Zhang<sup>1</sup>, Jingwei Zhou<sup>1</sup>, Ying*  
6 *Hou<sup>1</sup>, Peizhi Liu<sup>1</sup>, Bingshe Xu<sup>1</sup>, Haixia Zhang<sup>1\*</sup>, Junjie Guo<sup>1\*</sup>*

7

8 <sup>1</sup>Key Laboratory of Interface Science and Engineering in Advanced Materials, Ministry  
9 of Education, Taiyuan University of Technology, Taiyuan 030024, P. R. China

10 E-mail address: [zhanghaixia@tyut.edu.cn](mailto:zhanghaixia@tyut.edu.cn); [guojunjie@tyut.edu.cn](mailto:guojunjie@tyut.edu.cn)

11

12 <sup>2</sup>Key Laboratory for Advanced Materials and Joint International Research Laboratory  
13 for Precision Chemistry and Molecular Engineering, East China University of Science  
14 and Technology, Shanghai, 200237, China.

15

16

17

18

19

20

21

## 1 Experimental sections

### 2 Chemicals and materials

3 Ammonium persulphate ( $(\text{NH}_4)_2\text{S}_2\text{O}_8$ , AR) and sodium hydroxide (NaOH, AR) were  
4 purchased from Macklin Ltd (Shanghai, China). Lanthanum nitrate hexahydrate  
5 ( $\text{La}(\text{NO}_3)_3 \cdot 6\text{H}_2\text{O}$ , 99.99%) and Cobalt nitrate hexahydrate ( $\text{Co}(\text{NO}_3)_2 \cdot 6\text{H}_2\text{O}$ , 99.99%)  
6 were purchased from Aladdin Chemical Ltd (Shanghai, China). Hydrochloric acid  
7 (HCl, AR.) and ethanol ( $\text{C}_2\text{H}_5\text{OH}$ , AR.) were purchased from Tianjin Chemical Work.  
8 Potassium hydroxide (KOH, AR) was purchased from Sinopharm Chemical Reagent  
9 (Shanghai). Ruthenium oxide ( $\text{RuO}_2$ , 99.9 wt.%) was purchased from Alfa. Nafion (5  
10 wt.%, DuPont) was purchased from commercial suppliers. All the materials were  
11 utilized in the absence of further purification in this study. The deionized (DI) water  
12 employed in the whole experiments was prepared by an ultrapure purification system.

### 13 Preparation of CuO NWs

14 Weighing 1.426 g of  $(\text{NH}_4)_2\text{S}_2\text{O}_8$  and 5.000 g of NaOH in a beaker with 50 mL of DI  
15 water were stirred until all chemicals dissolved. A piece of copper foam (CF) with a  
16 size of  $1 \times 3$  cm was washed successively in ethanol, 3 M hydrochloric acid and  
17 deionized water. Subsequently, the cleaned CF was immersed into above-mentioned  
18 solution for 15 min, the  $\text{Cu}(\text{OH})_2$  NWs on the surface of CF were performed, which  
19 were cleaned by DI water and dried at 60 °C. Finally, the  $\text{Cu}(\text{OH})_2$  NWs were annealed  
20 at 180 °C in air for 2 h to obtain the CuO NWs on CF (mark as CuO NWs).

### 21 Preparation of CH/LH@Cu NWs

22 CH/LH was grown onto the surface of CuO NWs by electrodeposition (ED) at 25 °C.  
23 The reaction was operated in a three-electrode configuration, where the CuO NWs

1 loaded on CF (1×1.5 cm) was directly used as the working electrode, Pt foil and  
2 saturated calomel electrode (SCE) were used as the counter electrode and the reference  
3 electrode, respectively. 7.5 mmol  $\text{Co}(\text{NO}_3)_2 \cdot 6\text{H}_2\text{O}$  and 6 mmol  $\text{La}(\text{NO}_3)_3 \cdot 6\text{H}_2\text{O}$  were  
4 dissolved in 50 ml DI water as ED electrolyte. The ED was performed by applying a  
5 constant potential of  $-1.0\text{ V}$  vs SCE for 1500 s to obtain CH/LH@CuO<sub>x</sub> NWs.  
6 Subsequently, a constant potential ( $-88\text{ mV}$  vs. RHE) was applied to the  
7 CH/LH@CuO<sub>x</sub> NWs in 1 M KOH for 900 s, when the cathodic current achieved zero  
8 at 0 V vs. RHE, CH/LH@Cu NWs was prepared successfully. The products were  
9 washed with DI water, then put on filter paper and dried at room temperature. In  
10 particular, the porous structure of  $\text{Co}(\text{OH})_2/\text{La}(\text{OH})_3$  could be attributed to the  
11 formation of tiny bubbles of  $\text{H}_2$  on the working electrode surface during ED.

#### 12 *Preparation of CH/LH*

13 Similar to CH/LH@CuO<sub>x</sub> NWs, the CH/LH was synthesized via the same  
14 electrodeposition condition except the substrate was CF instead of CuO NWs.

#### 15 *Preparation of Pt/@Cu NWs and RuO<sub>2</sub>@Cu NWs*

16 Commercial Pt/C or RuO<sub>2</sub> powder was ultrasonically dispersed in a mixture of 500  
17  $\mu\text{L}$  DI water, 500  $\mu\text{L}$  ethanol and 80  $\mu\text{L}$  of 5 wt.% Nafion solution, which was sonicated  
18 for 30 min. The formed homogeneous ink was then dropped onto the CuO NWs and  
19 dried in air at 25 °C. The mass loading of the Pt/C (or RuO<sub>2</sub>) was identical to  
20 CH/LH@Cu NWs. A constant potential ( $-88\text{ mV}$  vs. RHE) was applied to Pt/C@Cu  
21 NWs and RuO<sub>2</sub>@Cu NWs in 1 M KOH for 900 s, when the cathodic current achieved  
22 zero at 0 V vs. RHE, the Pt/C@Cu NWs and RuO<sub>2</sub>@Cu NWs samples prepared  
23 successfully.

1 *Preparation of Co(OH)<sub>2</sub>@Cu NWs, La(OH)<sub>3</sub>@Cu NWs, CH/LH@CuO<sub>x</sub> NWs-1,*  
2 *CH/LH@CuO<sub>x</sub> NWs-2 and CH/LH@CuO<sub>x</sub> NWs-3*

3 Similar to CH/LH@CuO<sub>x</sub> NWs, the control samples were also synthesized via the  
4 same electrodeposition mode. The electrodeposition potential was  $-1.0$  V vs SCE, and  
5 the duration was 300 s. By changing the concentration of Co(NO<sub>3</sub>)<sub>2</sub>·6H<sub>2</sub>O and  
6 La(NO<sub>3</sub>)<sub>3</sub>·6H<sub>2</sub>O in ED electrolyte (50 mL) to obtain Co(OH)<sub>2</sub>@Cu NWs (7.5 mmol  
7 Co(NO<sub>3</sub>)<sub>2</sub>·6H<sub>2</sub>O), La(OH)<sub>3</sub>@Cu NWs (6 mmol La(NO<sub>3</sub>)<sub>3</sub>·6H<sub>2</sub>O), CH/LH@Cu NWs-1  
8 (7.5 mmol Co(NO<sub>3</sub>)<sub>2</sub>·6H<sub>2</sub>O and 1.5 mmol La(NO<sub>3</sub>)<sub>3</sub>·6H<sub>2</sub>O), CH/LH@Cu NWs-2 (7.5  
9 mmol Co(NO<sub>3</sub>)<sub>2</sub>·6H<sub>2</sub>O and 6 mmol La(NO<sub>3</sub>)<sub>3</sub>·6H<sub>2</sub>O) and CH/LH@Cu NWs-3 (7.5  
10 mmol Co(NO<sub>3</sub>)<sub>2</sub>·6H<sub>2</sub>O and 12 mmol La(NO<sub>3</sub>)<sub>3</sub>·6H<sub>2</sub>O).

#### 11 *Materials Characterization*

12 X-ray diffraction (XRD) patterns were collected on a Bruker D8 (Cu K $\alpha$  radiation).  
13 To eliminate extremely strong Cu diffraction peaks, CH/LH was electrodeposited on  
14 CF under the same conditions, and then CH/LH was scraped off from the substrate for  
15 XRD analysis. Morphology and structure of the materials were characterized using a  
16 scanning electron microscopy (SEM, TESCAN, LYRA3) and a high-resolution  
17 transmission electron microscopy (HRTEM, JEOL, JEM-2010F). The energy  
18 dispersive X-ray (EDX) was collected using Oxford instruments equipped on SEM and  
19 TEM. X-ray photoelectron spectroscopy (XPS) measurements were performed using  
20 an Amicus from 10 kV Mg K $\alpha$  radiation at the pressure of  $1 \times 10^{-7}$  Pa. The BET  
21 isotherms were evaluated using a nitrogen adsorption-desorption apparatus  
22 (Quadrachrome SI, Quantachrome). The chemical elements of the prepared samples were  
23 measured by inductively coupled plasma mass spectrometry (ICP-MS, PerkinElmer,  
24 Nexion 2000).

## 1 *Calculation Methods*

2 In this work, all spin-polarized DFT calculations were carried out using the Vienna  
3 Ab-initio Simulation Package (VASP).<sup>1</sup> The projector augmented wave (PAW)  
4 method<sup>2</sup> and the Perdew-Burke-Ernzerhof (PBE)<sup>3</sup> functional under the generalized  
5 gradient approximation (GGA)<sup>4</sup> were applied throughout the calculations. The kinetic  
6 energy cut-off was set to 400 eV, and the force threshold in structure optimization was  
7 0.05 eV Å<sup>-1</sup>. We used a large vacuum gap of 15 Å to eliminate the interactions between  
8 neighboring slabs.

9 For the model construction, we first built a *p* (3×3) surface slab containing three layers  
10 for Co(OH)<sub>2</sub> (001) surface, and the top two layers of Co(OH)<sub>2</sub> (001) were allowed to  
11 fully relax, while the bottom atom layer was kept fixed to mimic the bulk region. Then,  
12 we built a *p* (2×3) surface slab containing three layers for La(OH)<sub>3</sub> (100) surface, and  
13 the top three layers of the La(OH)<sub>3</sub>(100) were allowed to relax, while the bottom atom  
14 layer was kept fixed to mimic the bulk region. Finally, we also built heterojunction  
15 CH/LH system, this system main exposed Co(OH)<sub>2</sub> (001) surface which was modeled  
16 by a *p* (4×4) surface slab (*a* = *b* = 12.57 Å, *c* = 18.98 Å), containing one O–Co–O layer,  
17 a *p* (2×2) La(OH)<sub>3</sub> (001) surface (*a* = *b* = 13.06 Å, *c* = 16.93 Å), and all atoms were  
18 allowed to fully relax. A 2×2×1 *k*-point mesh was used in calculations of all these  
19 models. The on-site Coulomb interaction correction was necessary for the appropriate  
20 description of the Co 3*d* electrons, and all calculations were performed with *U* = 3.52  
21 eV, which were consistent with the values determined by previous studies.<sup>5</sup>

22 The hydrogen absorption energies (*E*<sub>ads</sub>(H)) on different surfaces were calculated as

23 
$$E_{\text{ads}}(\text{H}) = E_{(\text{M}+\text{H}^*)} - E_{\text{M}} - 1/2E_{\text{H}_2}$$

1 where  $E_{(M+H^*)}$  is the total energy of the adsorption system;  $E_M$  is calculated energies  
2 of the clean surface;  $E_{H_2}$  is the energy of a hydrogen molecule in the gas phase. The  
3 Gibbs free energy for the hydrogen absorption was corrected with entropy and zero  
4 point energy as

$$5 \quad \Delta G_H = E_{\text{ads}}(H) + \Delta E_{\text{ZPE}} - T \times \Delta S_H$$

6 where  $E_{\text{ads}}(H)$  is the hydrogen absorption energy,  $\Delta E_{\text{ZPE}}$  is the difference in zero point  
7 energy between the adsorbed hydrogen and hydrogen in the gas phase and  $\Delta S_H$  is the  
8 entropy difference between the adsorbed state and the gas phase, and  $T$  is the  
9 temperature. The values used for corrections of  $\Delta E_{\text{ZPE}}$  and  $\Delta S$  were calculated by  
10 frequencies and listed in **Table S1**.

#### 11 *Electrocatalytic Measurements*

12 Electrochemical measurements were carried out on a CHI 760E electrochemical  
13 workstation (CH Instruments, Inc., Shanghai) in a standard three-electrode system at  
14 25 °C with an aqueous solution of 1.0 M KOH used as the electrolyte. A Hg/HgO (1.0  
15 M KOH) electrode and a graphite rod were used as the reference electrode and counter  
16 electrode, respectively. The measured potentials vs Hg/HgO were converted to  
17 reversible hydrogen electrode (RHE) according to the equation  $E(\text{RHE}) = E(\text{Hg/HgO})$   
18  $+ 0.098 + 0.059 \text{ pH}$ . All of the collected linear sweeping voltammetry (LSV) curves  
19 were corrected via 95% iR auto-compensation. The polarization curves obtained from  
20 LSV measurements were recorded at a scan rate of  $5 \text{ mV s}^{-1}$ . The long-term durability  
21 test was performed using chronopotentiometric measurements. The ECSA was  
22 determined by the electrochemical  $C_{\text{dl}}$  from the scan-rate dependence of cyclic  
23 voltammetry (CV). All Electrochemical impedance spectrum (EIS) was collected in a  
24 frequency range from 100 k to 0.01 Hz at open circuit voltage.



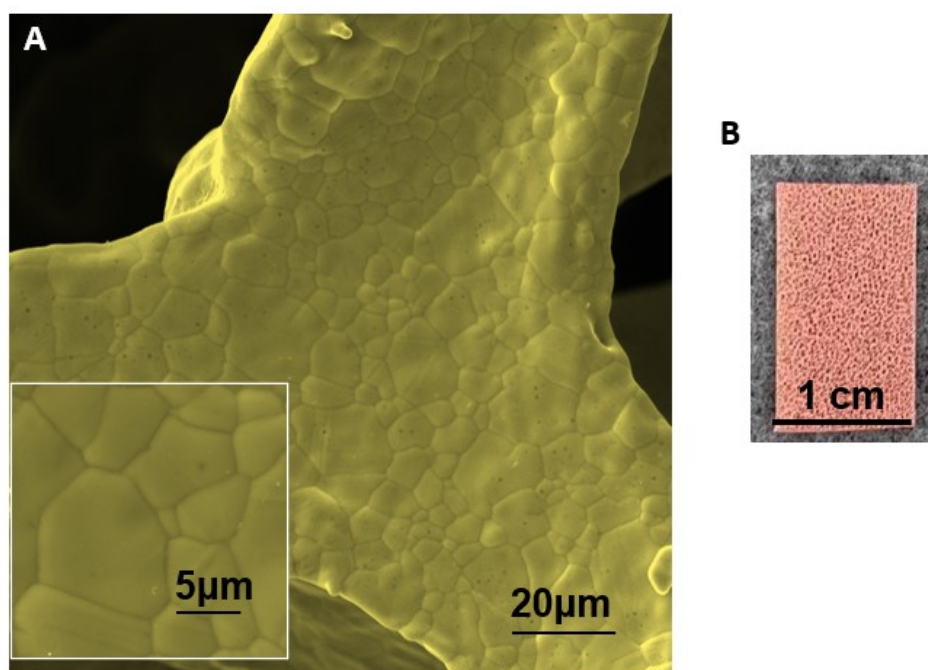

Figure S1. (A) Typical SEM image of Cu foam (CF), (B) Optical picture of CF.

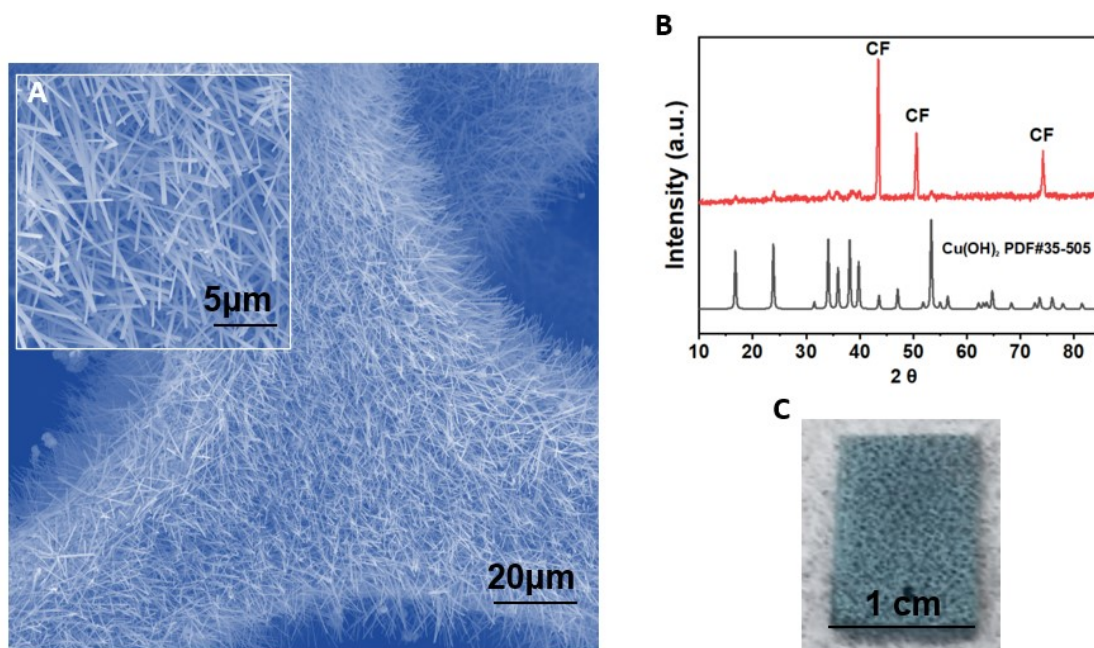

Figure S2. (A) SEM images, (B) XRD patterns of Cu(OH)<sub>2</sub> NWs and CF, (C) Optical picture of Cu(OH)<sub>2</sub> NWs.

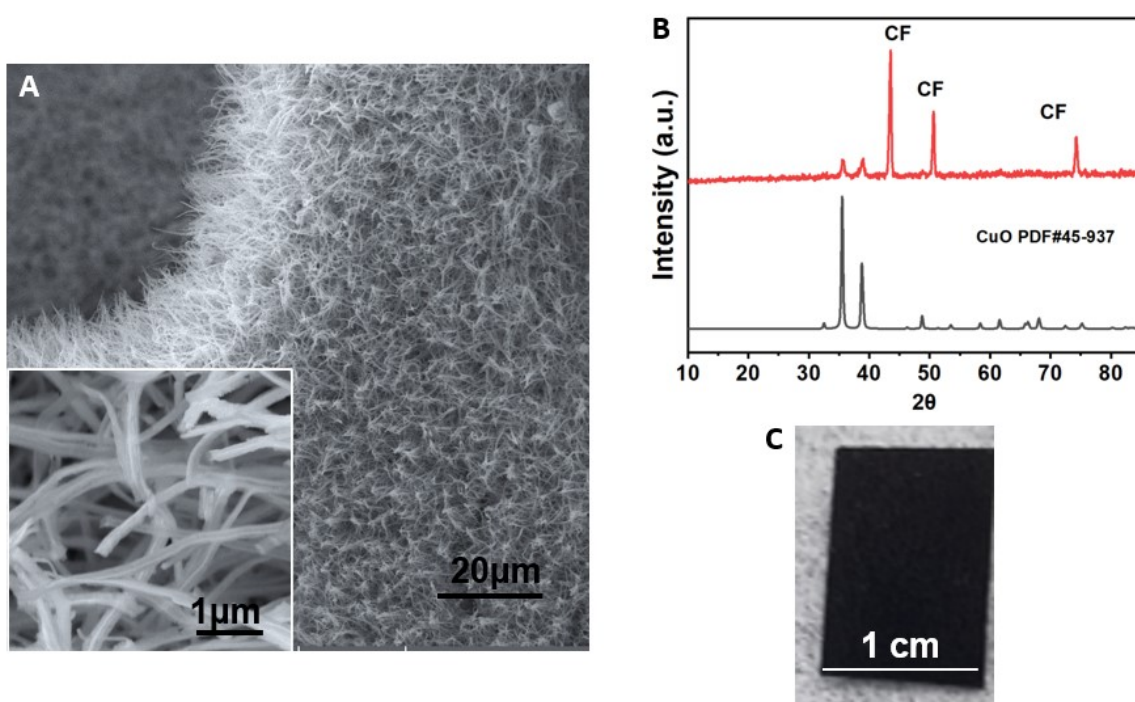

Figure S3. (A) SEM images, (B) XRD patterns of CuO NWs and CF, (C) Optical picture of CuO NWs.

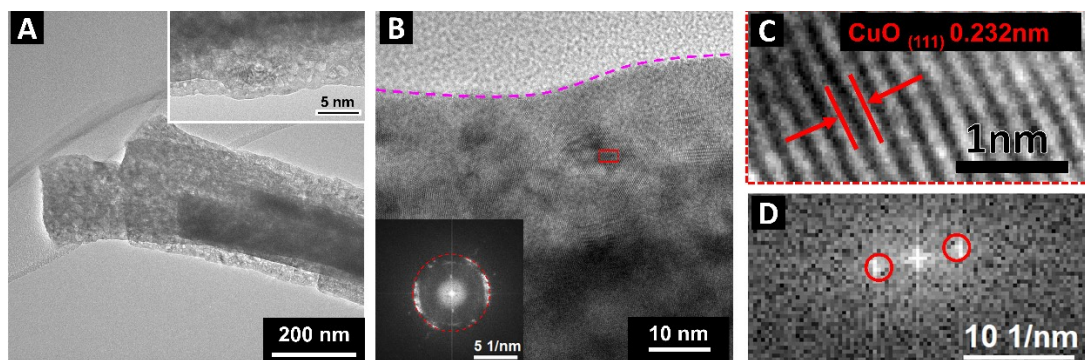

Figure S4. (A) Low-magnification TEM images of CuO NWs, (B, C) HRTEM images of the CuO NWs and corresponding fast Fourier transformation (FFT) image (D).

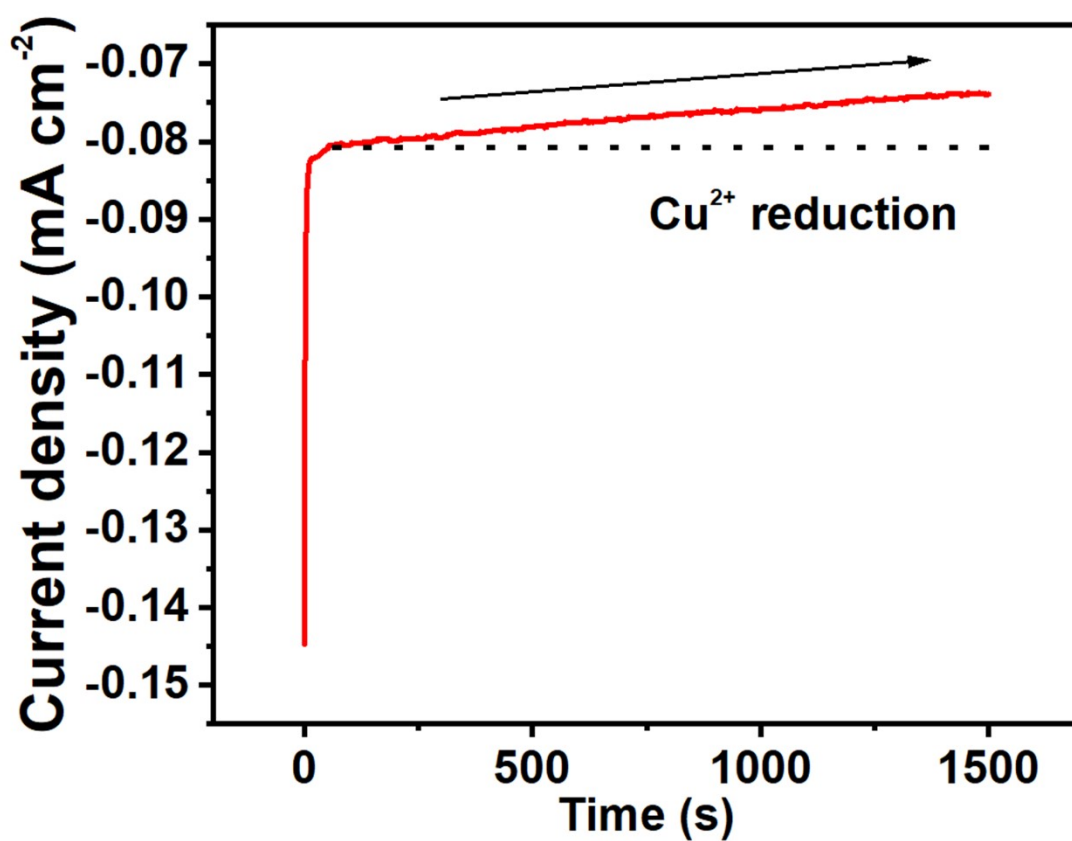

Figure S5. Electrochemical deposition i-t curve, the decreasing trend in current density means that the high price copper is reduced.

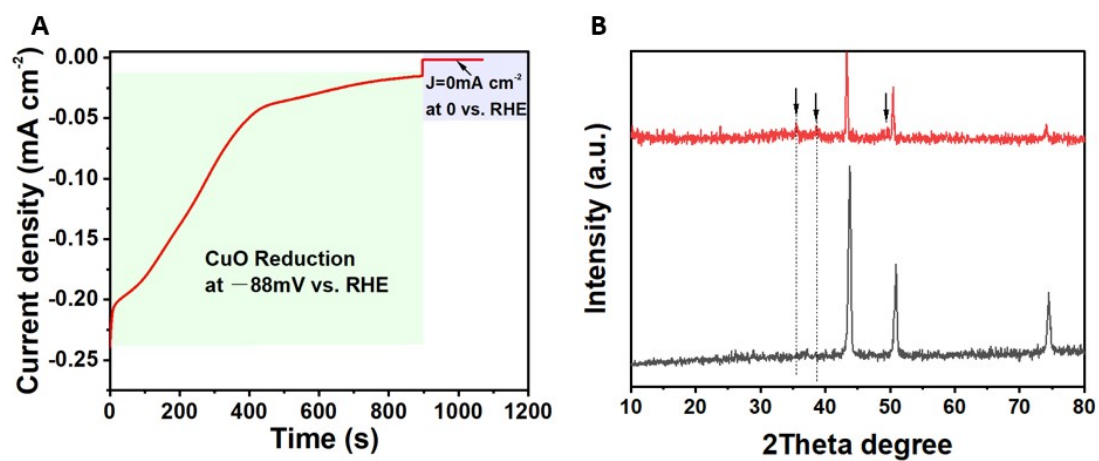

Figure S6. (A) The CH/LH@CuO<sub>x</sub> NWs with it-amperometric reduction ( $-0.1$  V vs. RHE) for a certain time. The current density reaches to  $0 \text{ mA cm}^{-2}$  at  $0 \text{ V}$  (vs. RHE) which means that all  $\text{Cu}^{2+}$  are reduced to Cu, (B) XRD patterns of CH/LH@CuO<sub>x</sub> NWs (red) and CH/LH@Cu NWs (black).

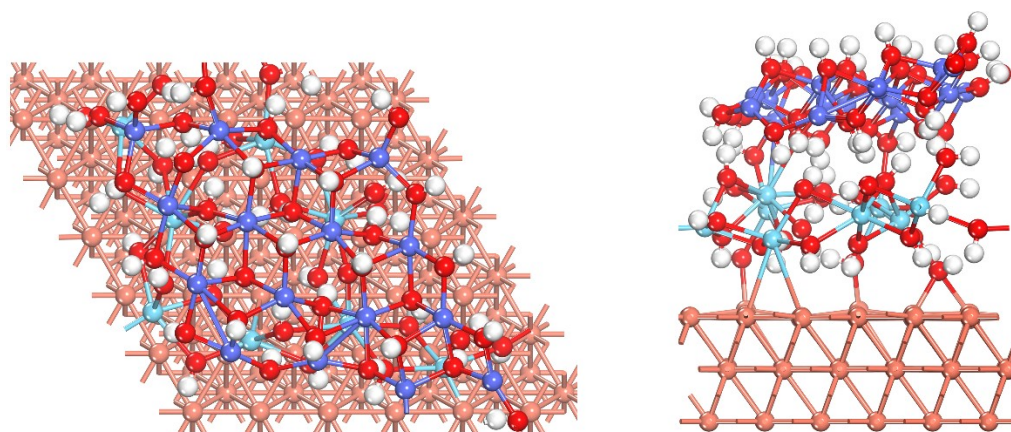

Figure S7. Schematic models of CH/LH heterostructure on Cu NWs.

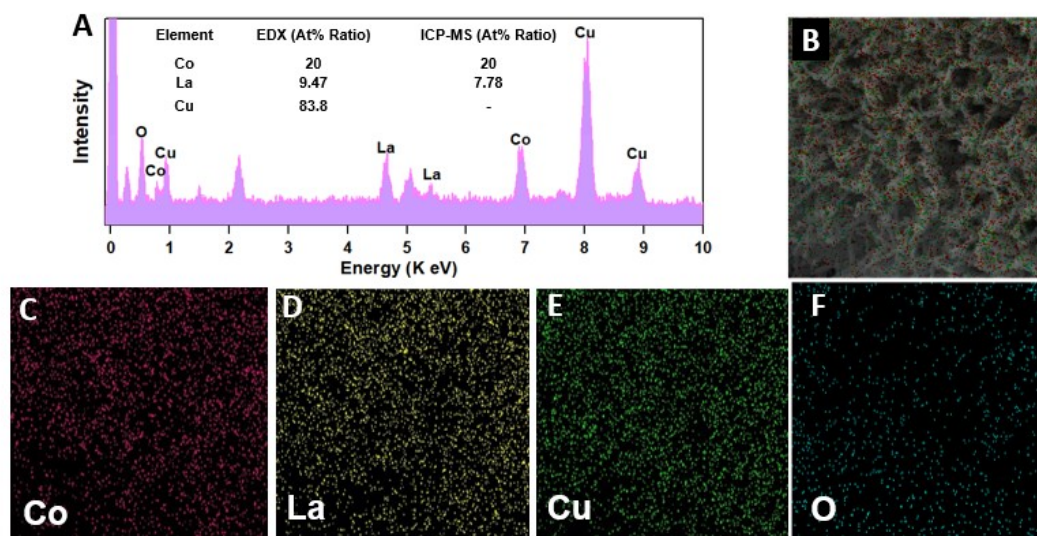

Figure S8. (A) EDX spectrum of CH/LH@Cu NWs (inset, At% ratio of EDX and ICP-MS) and (B-F) EDX mapping.

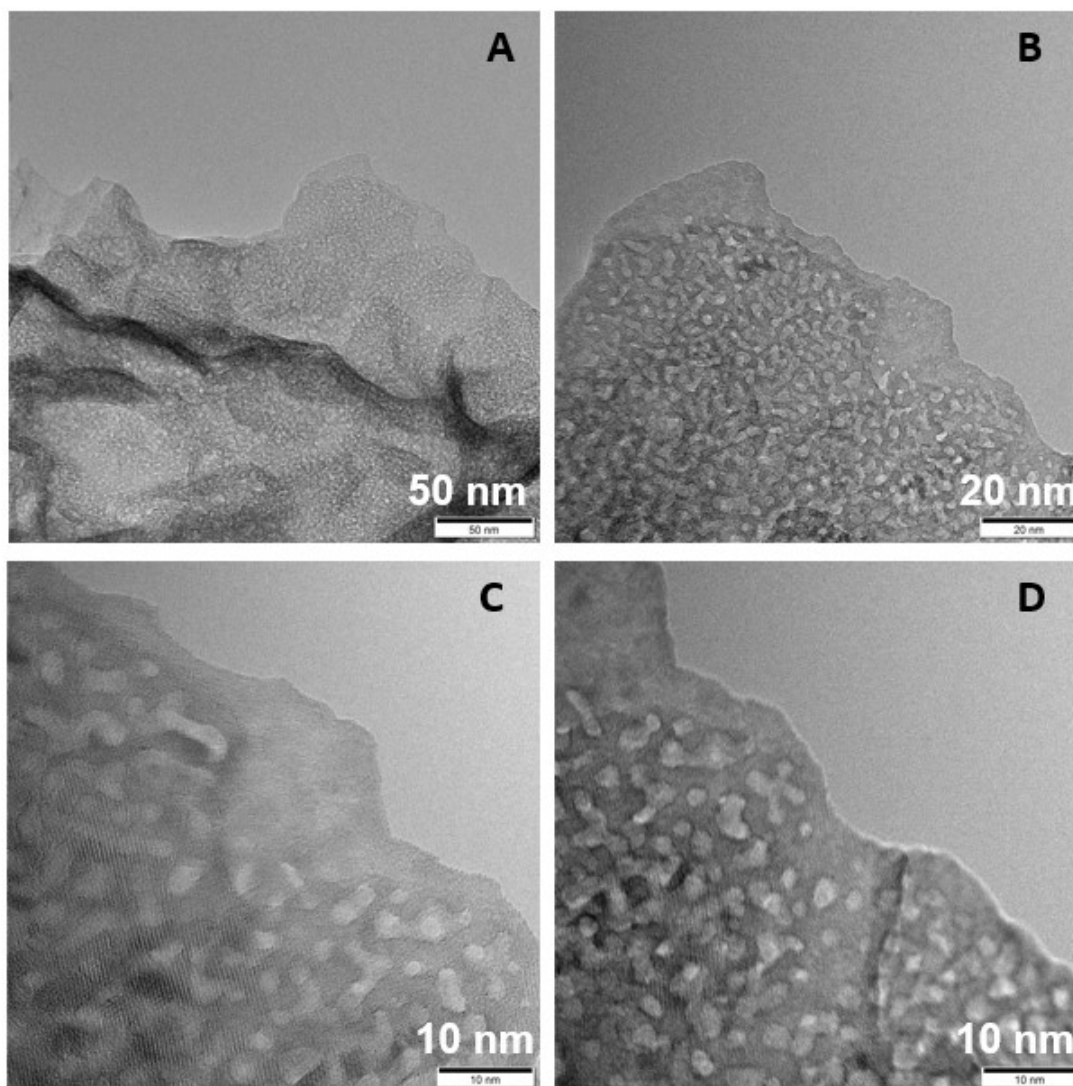

Figure S9. HRTEM image of the porous CH/LH@Cu NWs.

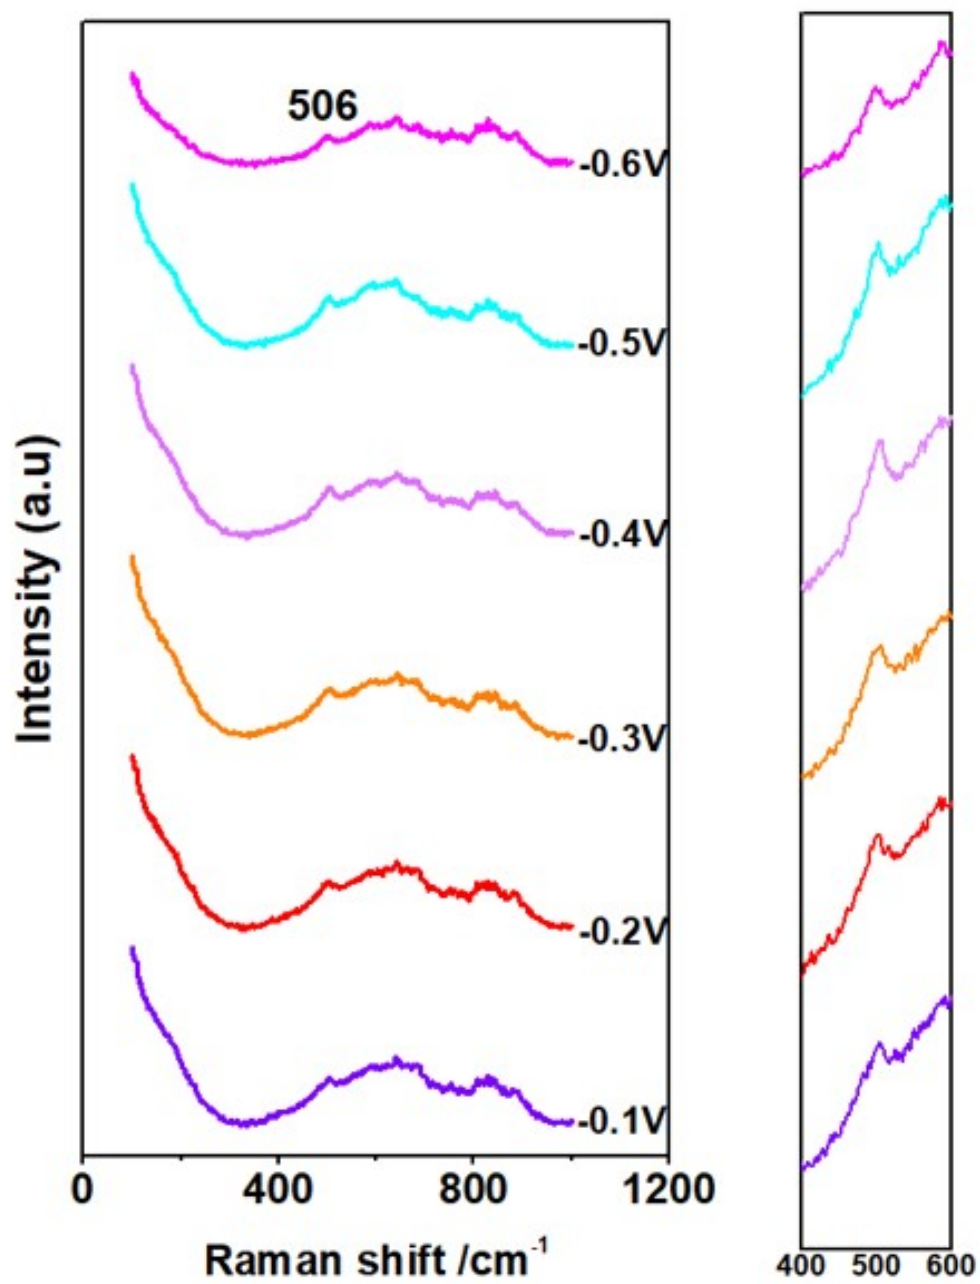

Figure S10. In situ Raman spectra of CH/LH@Cu NWs at a vary potential.

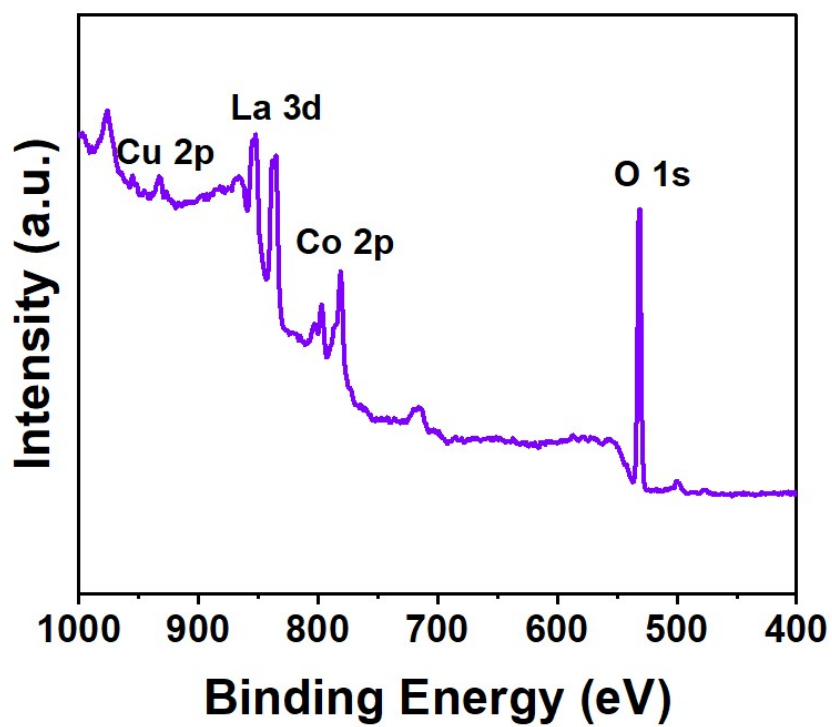

Figure S11. XPS survey of CH/LH@Cu NWs.

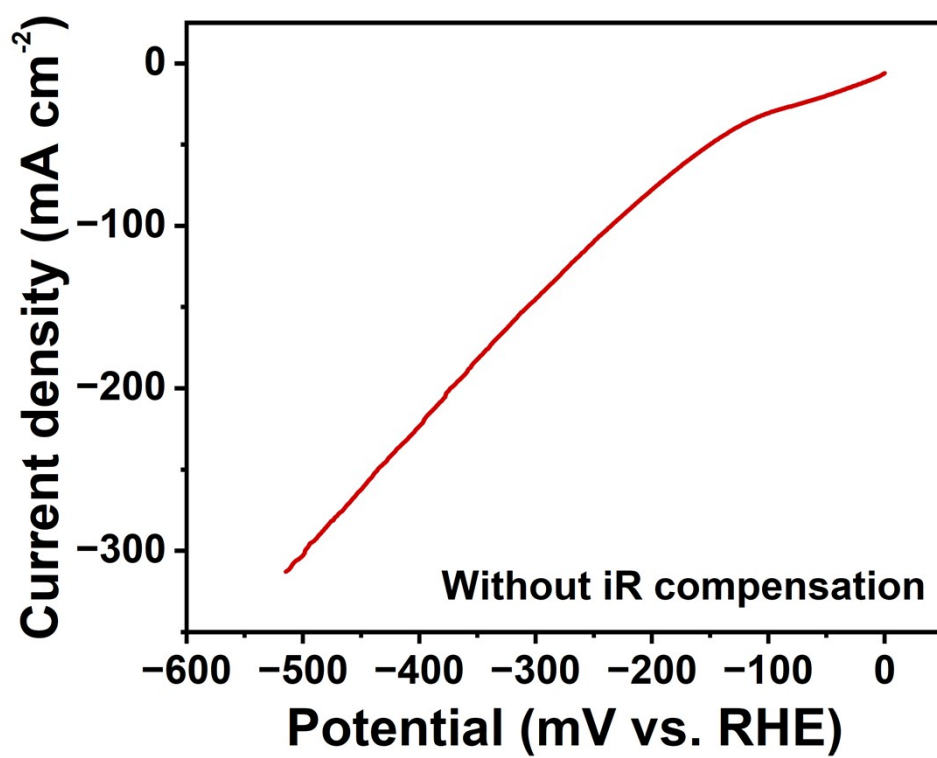

Figure S12. HER polarization curves of CH/LH@Cu NWs without iR correction.

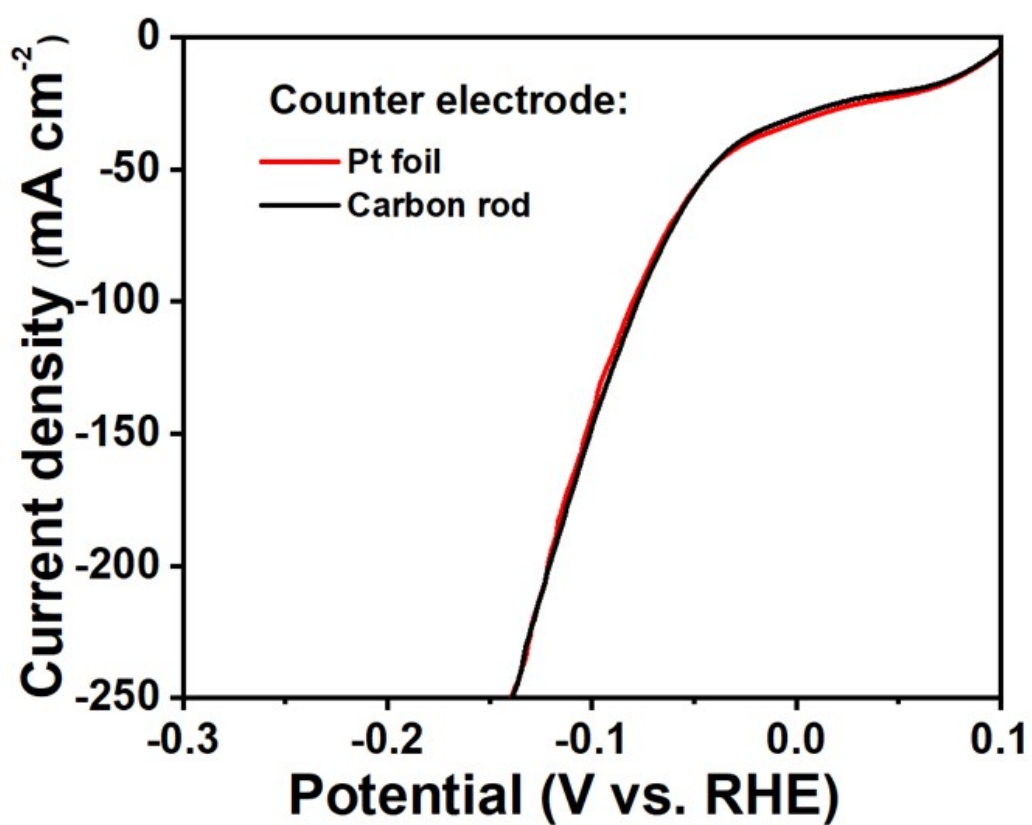

Figure S13. HER polarization curves of CH/LH@Cu NWs in 1 M KOH with graphite rod and Pt foil as the counter electrode.

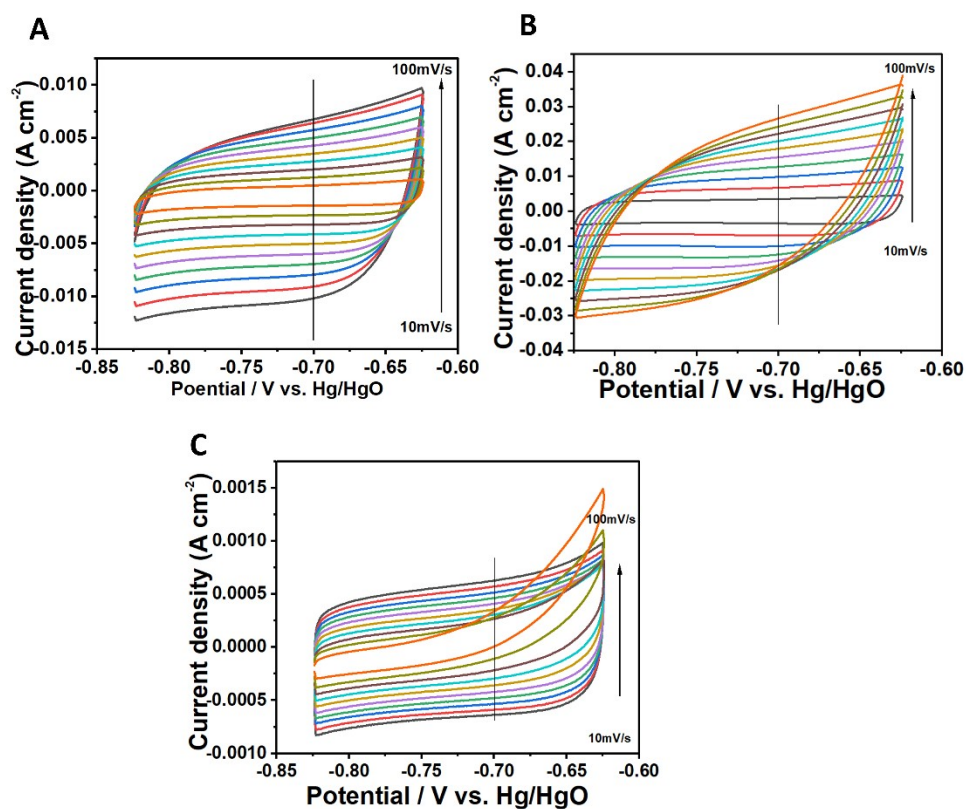

Figure S14. Scan rate dependence of the current densities in the CV curves of different HER catalysts with scan rates ranging from 10 mV s<sup>-1</sup> to 100 mV s<sup>-1</sup>. (A) CH/LH@Cu NWs, (B) Pt/C@Cu NWs, (C) CH/LH.

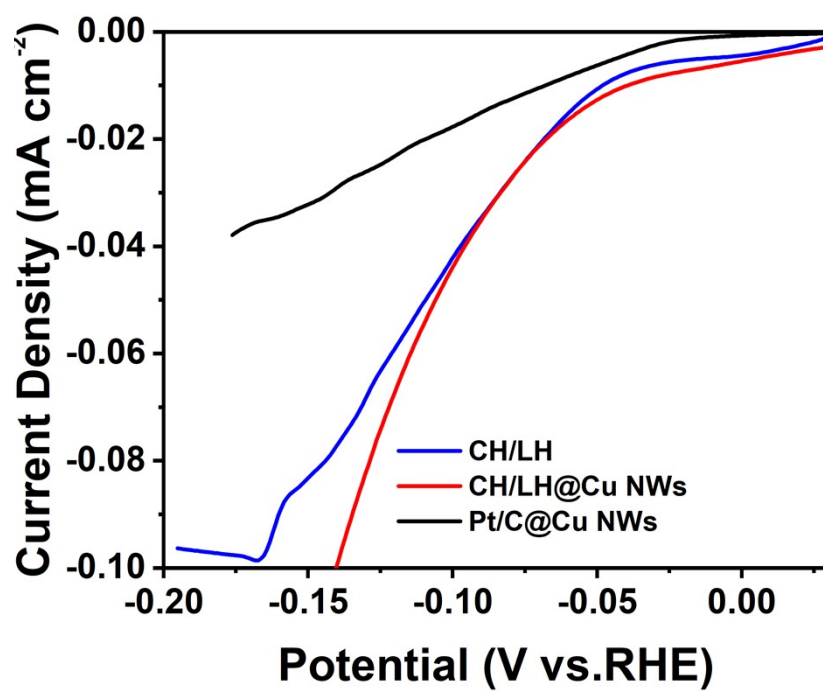

Figure S15. ECSA-normalized LSV curves of different catalysts for HER.

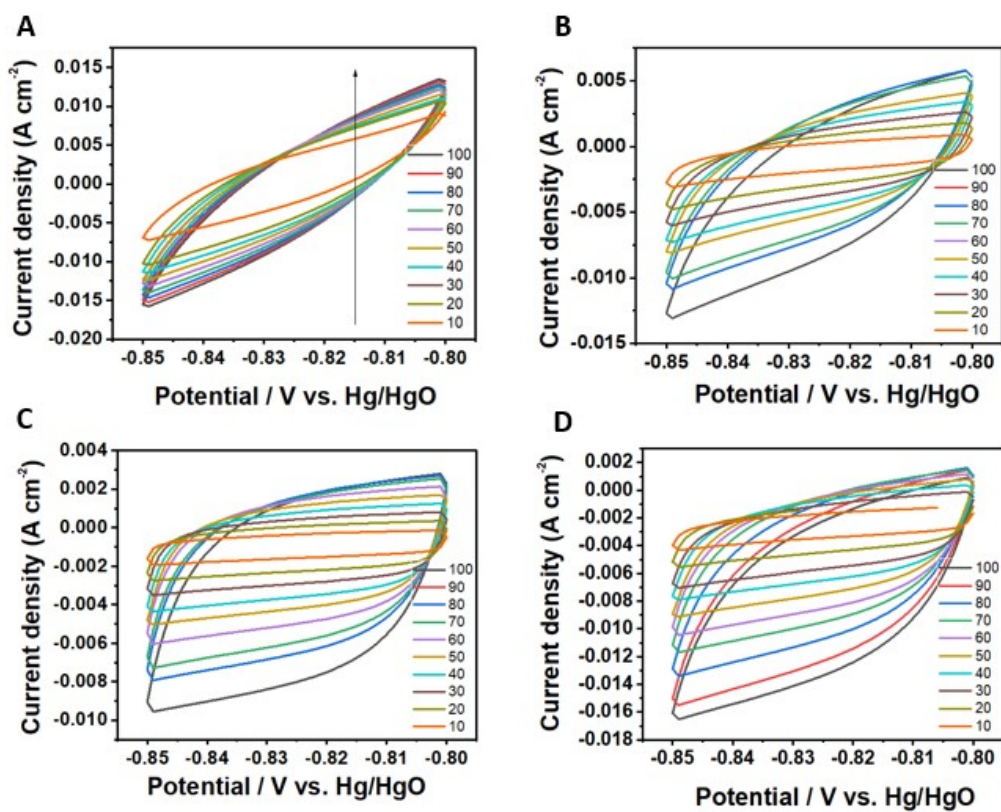

Figure S16. Scan rate dependence of the current densities in the CV curves of different HER catalysts with scan rates ranging from 10  $\text{mV s}^{-1}$  to 100  $\text{mV s}^{-1}$ . (A)  $\text{Co}(\text{OH})_2@\text{Cu}$  NWs, (B)  $\text{CH/LH}@\text{Cu}$  NWs-1, (C)  $\text{CH/LH}@\text{Cu}$  NWs-2, (D)  $\text{CH/LH}@\text{Cu}$  NWs-3.

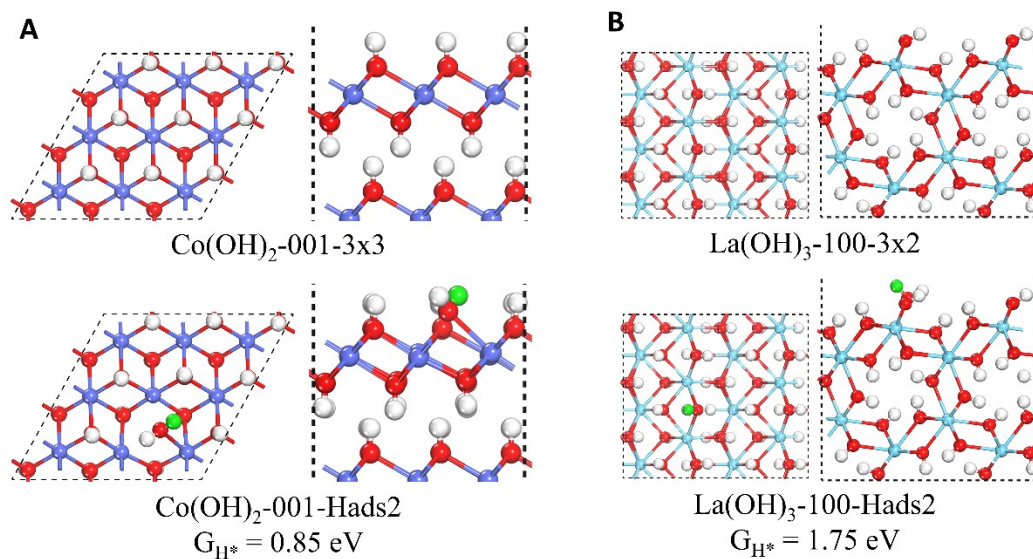

Figure S17. Schematic models of illustrate the (A) Co(OH)<sub>x</sub> and (B) La(OH)<sub>x</sub>, as well as corresponding optimized structures of H\* adsorption.

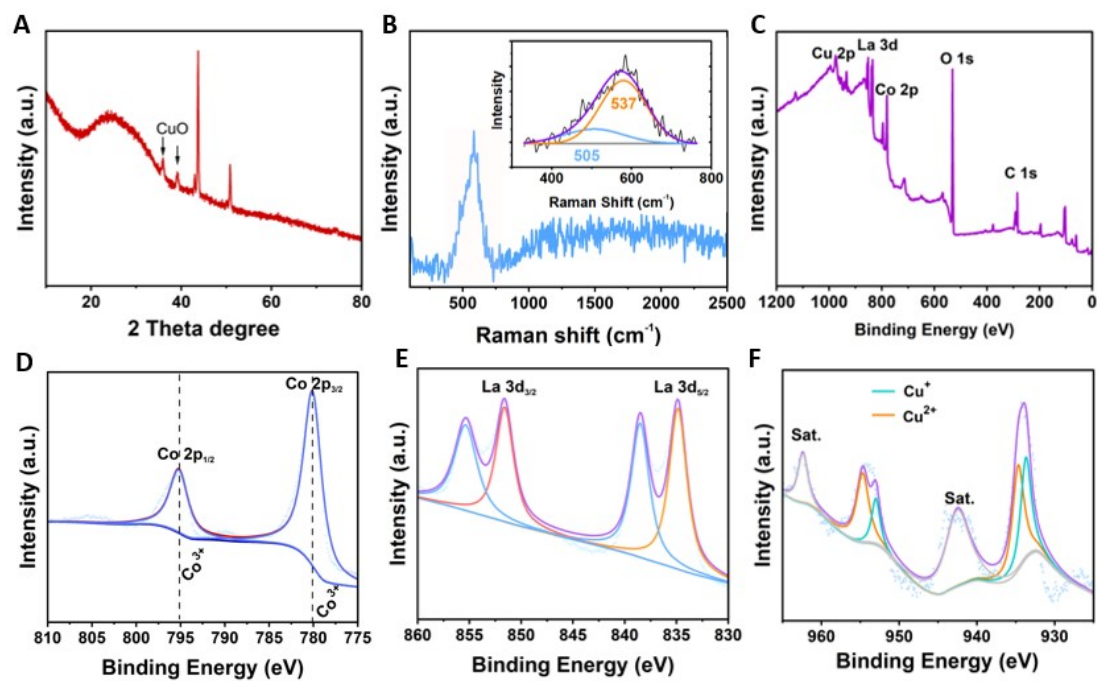

Figure S18. (A) XRD pattern, (B) Raman spectrum, (C) XPS survey and (D-F) high resolution XPS spectra of Co 2p, La 3d and Cu 2p for CH/LH@Cu NWs after OER.

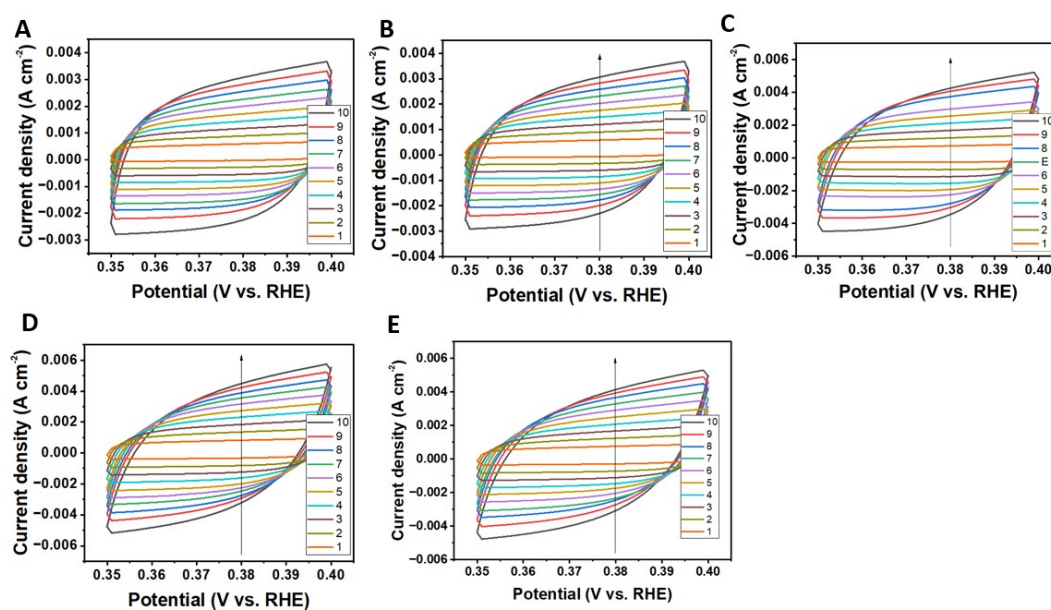

Figure S19. Scan rate dependence of the current densities in the CV curves of different OER catalysts with scan rates ranging from  $10 \text{ mV s}^{-1}$  to  $100 \text{ mV s}^{-1}$ . (A)  $\text{La}(\text{OH})_2@\text{Cu}$  NWs, (B)  $\text{La}(\text{OH})_2@\text{Cu}$  NWs, (C)  $\text{CH/LH}@\text{Cu}$  NWs-1, (D)  $\text{CH/LH}@\text{Cu}$  NWs-2, (E)  $\text{CH/LH}@\text{Cu}$  NWs-3.

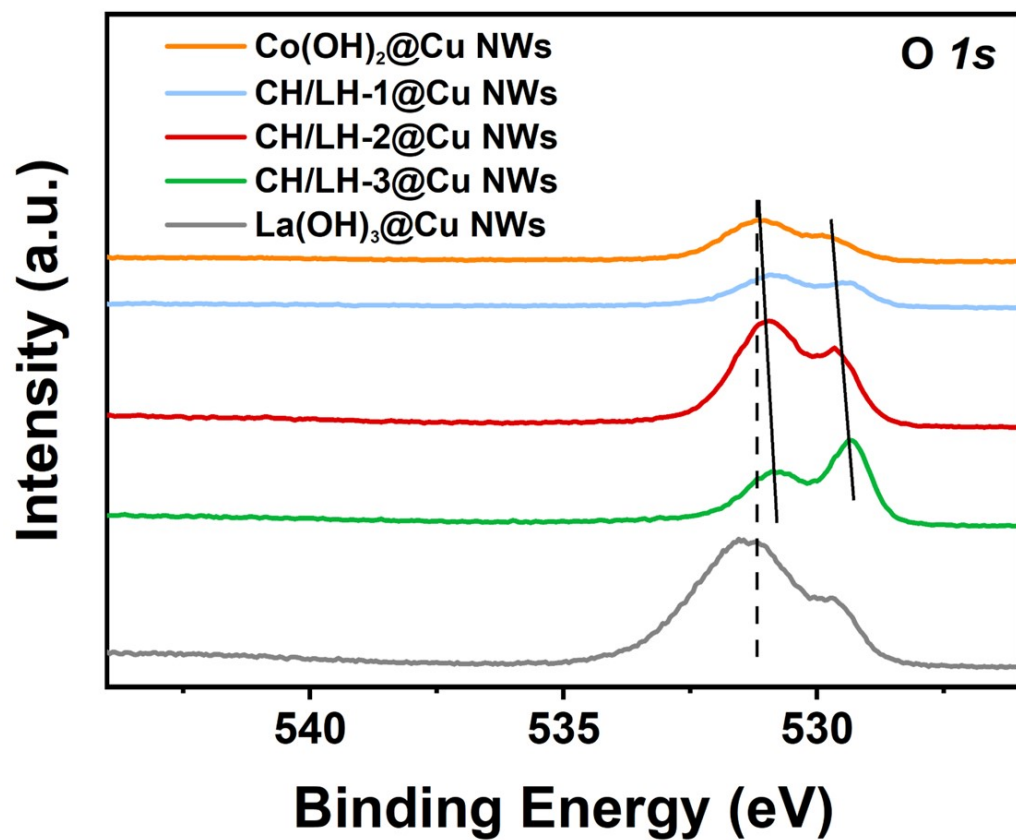

Figure S20. High resolution XPS spectra of O 1s for different samples.

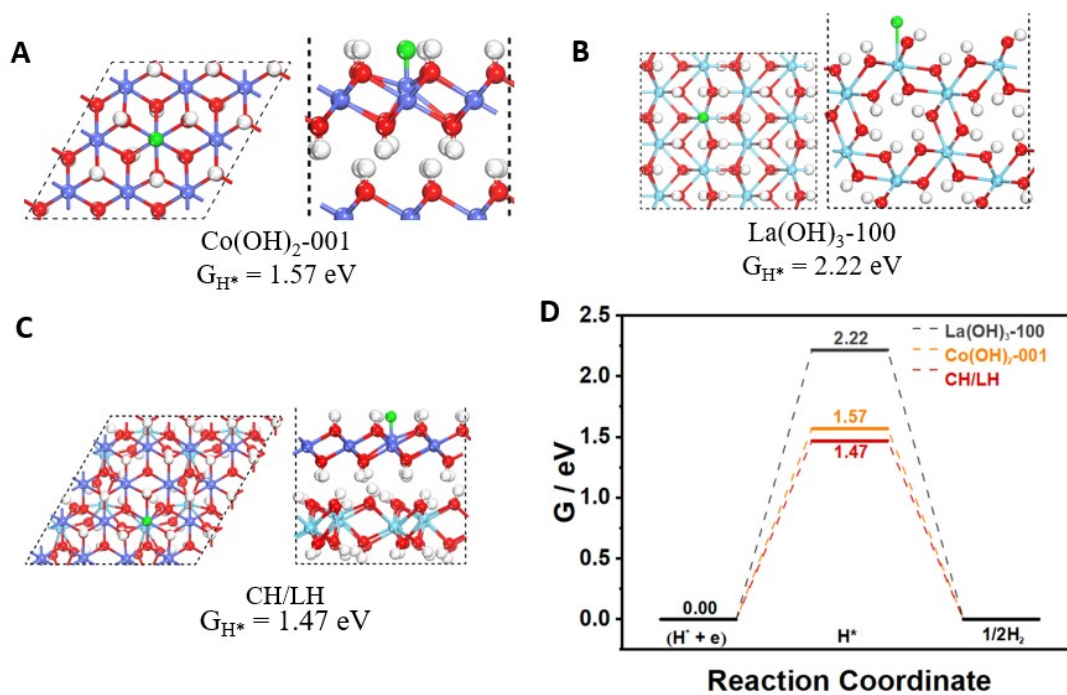

Figure S21. (A-C) Schematic models to illustrate the CH/LH@Cu NWs heterostructure and corresponding optimized structures of hydrogen specie adsorption at metal sites. (D)  $\Delta G_{\text{H}^*}$  simulated at the equilibrium potential for the  $\text{La}(\text{OH})_3$ ,  $\text{Co}(\text{OH})_2$  and CH/LH.

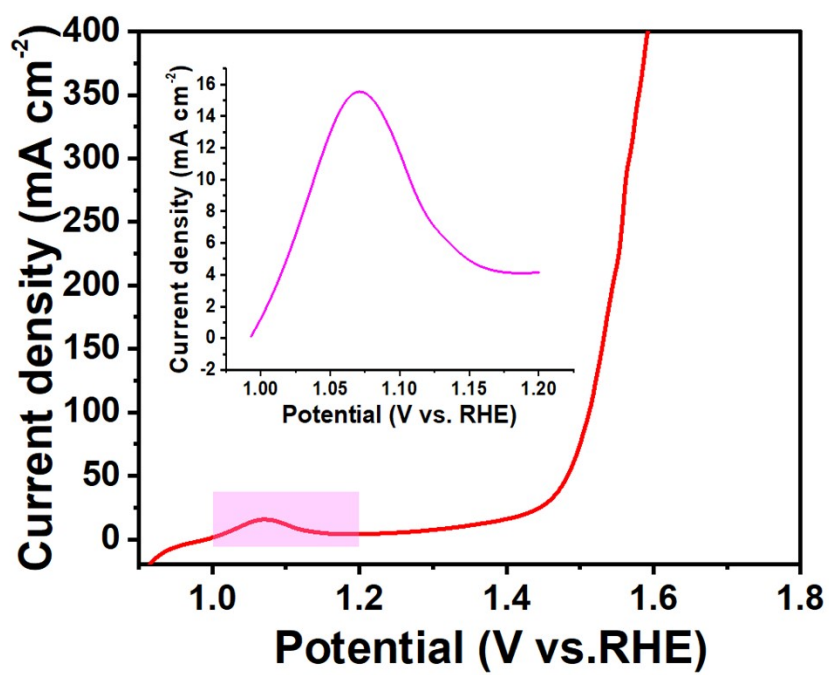

Figure S22. OER polarization curves of CH/LH@Cu NWs in 1 M KOH.

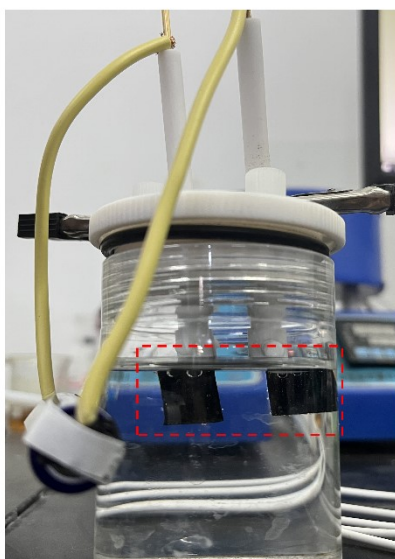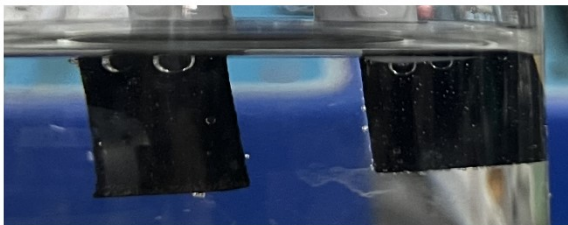

Figure S23. A single 1.5 V AA battery to drive the water splitting (CH/LH@Cu NWs || CH/LH@Cu NWs in 1 M KOH).

**Table S1.** The entropy and zero-point energy corrections in determining the free energy of hydrogen adsorbed on different catalysts.

| Catalysts                       | $T \times \Delta S$ (eV) (298 K) | $\Delta E_{\text{ZPE}}$ (eV) |
|---------------------------------|----------------------------------|------------------------------|
| <b>Co(OH)<sub>2</sub> (001)</b> | 0.02                             | 0.28                         |
| <b>La(OH)<sub>3</sub> (100)</b> | 0.01                             | 0.28                         |
| <b>CH/LH</b>                    | 0.02                             | 0.03                         |

**Table S2.** Comparison of the overpotentials demanded at 10 and 100 mA cm<sup>-2</sup> as well as Tafel slope between our catalyst and recently reported HER catalysts (Unless otherwise noted, all of electrolyte are 1M KOH).

| Electrocatalysts                                | HER@10 cm <sup>-2</sup>                               | HER@100cm <sup>-2</sup> | Tafel Slope ( mV dec <sup>-1</sup> ) | Reference                                                        |
|-------------------------------------------------|-------------------------------------------------------|-------------------------|--------------------------------------|------------------------------------------------------------------|
| CH/LH@Cu NWs                                    | 36 mV                                                 | 75 mV                   | 22.9                                 | This Work                                                        |
| NiCoN Ni <sub>x</sub> P NiCoN                   | 165 mV                                                | -                       | 139.2                                | <i>ACS Energy Lett.</i> <b>2020</b> , 5, 2681 <sup>6</sup>       |
| MoO <sub>3</sub> /Ni-NiO                        | 152 mV                                                | 249 mV                  | 36                                   | <i>Adv. Mater.</i> <b>2020</b> , 32, 2003414 <sup>7</sup>        |
| P,S-Co <sub>x</sub> O <sub>y</sub> /Cu@CuS NWs  | 116 mV                                                | -                       | 139.2                                | <i>Adv. Funct. Mater.</i> <b>2021</b> , 31, 2007822 <sup>8</sup> |
| CuNi@NiFeCu                                     | 42 mV                                                 | -                       | 133                                  | <i>Appl. Catal., B</i> <b>2021</b> , 298, 120600 <sup>9</sup>    |
| Graphene/MoS <sub>2</sub> /FeCoNiP <sub>x</sub> | 43 mV                                                 | 127 mV                  | 25.2                                 | <i>Nat Commun</i> <b>2021</b> , 12, 1380 <sup>10</sup>           |
| Co/CoMoN/NF                                     | -                                                     | 173 mV                  | 68.9                                 | <i>Adv. Sci.</i> <b>2022</b> , 9, 2105313 <sup>11</sup>          |
| Sn <sub>4</sub> P <sub>3</sub>                  | 110 mV, 62 mV in 0.5 M H <sub>2</sub> SO <sub>4</sub> | -                       | 139.2                                | <i>ACS Nano</i> <b>2022</b> , 16, 3, 4861 <sup>12</sup>          |
| CoFe-LDH@NiS                                    | 38 mV                                                 | 238 mV                  | 33                                   | <i>Appl. Catal., B</i> <b>2022</b> , 308, 121221 <sup>13</sup>   |

**Table S3.** Comparison of the overpotentials among our catalyst and recently reported OER and OWS catalysts (Unless otherwise noted, all of electrolyte are 1 M KOH)

| Electrocatalysts                                        | OER                                                        | OWS                                                        | Reference                                                        |
|---------------------------------------------------------|------------------------------------------------------------|------------------------------------------------------------|------------------------------------------------------------------|
| <b>CH/LH@Cu NWs</b>                                     | 273 mV@100 cm <sup>-2</sup>                                | 1.56 V@20 cm <sup>-2</sup>                                 | This Work                                                        |
| <b>Mo<sub>51</sub>Ni<sub>40</sub>Fe<sub>9</sub> NBs</b> | 292 mV@50 cm <sup>-2</sup>                                 | 1.55 V@10 cm <sup>-2</sup>                                 | <i>ACS Catal.</i> <b>2019</b> , 9, 1013 <sup>14</sup>            |
| <b>NiCoN NixP NiCoN</b>                                 | -                                                          | 1.81 mV@10 cm <sup>-2</sup>                                | <i>ACS Energy Lett.</i> <b>2020</b> , 5, 2681 <sup>6</sup>       |
| <b>MoO<sub>3</sub>/Ni-NiO</b>                           | 347 mV@100 cm <sup>-2</sup>                                | 1.55 mV@10 cm <sup>-2</sup>                                | <i>Adv. Mater.</i> <b>2020</b> , 32, 2003414 <sup>7</sup>        |
| <b>P,S-Co<sub>x</sub>O<sub>y</sub>/Cu@CuS NWs</b>       | 280 mV@10 cm <sup>-2</sup>                                 | 1.52 mV@10 cm <sup>-2</sup><br>1.77 mV@50 cm <sup>-2</sup> | <i>Adv. Funct. Mater.</i> <b>2021</b> , 31, 2007822 <sup>8</sup> |
| <b>CuNi@NiFeCu</b>                                      | 285 mV@50 cm <sup>-2</sup>                                 | 1.51 mV@10 cm <sup>-2</sup>                                | <i>Appl. Catal., B</i> <b>2021</b> , 298, 120600 <sup>9</sup>    |
| <b>Graphene/MoS<sub>2</sub>/FeCoNi(OH)<sub>x</sub></b>  | 225 mV@500 cm <sup>-2</sup>                                | 1.59 mV@100 cm <sup>-2</sup>                               | <i>Nat Commun</i> <b>2021</b> , 12, 1380 <sup>10</sup>           |
| <b>Co/CoMoN/NF</b>                                      | 308 mV@100 cm <sup>-2</sup>                                | 1.56 mV@100 cm <sup>-2</sup>                               | <i>Adv. Sci.</i> <b>2022</b> , 9, 2105313 <sup>11</sup>          |
| <b>Sn<sub>4</sub>P<sub>3</sub></b>                      | 169 mV@20 cm <sup>-2</sup>                                 | 1.482 mV@10 cm <sup>-2</sup>                               | <i>ACS Nano</i> <b>2022</b> , 16, 3, 4861 <sup>12</sup>          |
| <b>CoFe-LDH@NiSe</b>                                    | 127 mV@100 cm <sup>-2</sup><br>285 mV@100 cm <sup>-2</sup> | 1.51 mV@10 cm <sup>-2</sup>                                | <i>Appl. Catal., B</i> <b>2022</b> , 308, 121221 <sup>13</sup>   |

## Reference

1. G. Kresse and J. Furthmüller, *Physical Review B*, 1996, **54**, 11169-11186.
2. P. E. Blöchl, *Phys Rev B Condens Matter*, 1994, **50**, 17953-17979.
3. J. P. Perdew, K. Burke and M. Ernzerhof, *Phys Rev Lett*, 1996, **77**, 3865-3868.
4. M. P. Teter, M. C. Payne and D. C. Allan, *Physical Review B*, 1989, **40**, 12255-12263.
5. L. Gong, D. Zhang, C.-Y. Lin, Y. Zhu, Y. Shen, J. Zhang, X. Han, L. Zhang and Z. Xia, *Adv. Energy Mater.*, 2019, **9**, 1902625.
6. L. Yu, L. B. Wu, S. W. Song, B. McElhenny, F. H. Zhang, S. Chen and Z. F. Ren, *ACS Energy Lett.*, 2020, **5**, 2681-2689.
7. X. Li, Y. Wang, J. Wang, Y. Da, J. Zhang, L. Li, C. Zhong, Y. Deng, X. Han and W. Hu, *Adv. Mater.*, 2020, **32**, 2003414.
8. T. L. L. Doan, D. T. Tran, D. C. Nguyen, D. Kim, N. H. Kim and J. H. Lee, *Adv. Funct. Mater.*, 2021, **31**.
9. D. Cao, H. Xu and D. Cheng, *Appl. Catal., B*, 2021, **298**, 120600.
10. X. X. Ji, Y. H. Lin, J. Zeng, Z. H. Ren, Z. J. Lin, Y. B. Mu, Y. J. Qiu and J. Yu, *Nat. Commun.*, 2021, **12**.
11. H. Ma, Z. Chen, Z. Wang, C. V. Singh and Q. Jiang, *Adv. Sci.*, 2022, **9**, 2105313.
12. S. Riyajuddin, M. Pahuja, P. K. Sachdeva, K. Azmi, S. Kumar, M. Afshan, F. Ali, J. Sultana, T. Maruyama, C. Bera and K. Ghosh, *ACS Nano*, 2022, **16**, 4861-4875.
13. S. M. N. Jeghan, D. Kim, Y. Lee, M. Kim and G. Lee, *Appl. Catal., B*, 2022, **308**, 121221.
14. X. L. Luo, Q. Shao, Y. C. Pi and X. Q. Huang, *ACS Catal.*, 2019, **9**, 1013-1018.
